# Supplementary material for: Cellulose Fabrics Functionalized with Sol–Gel Photocatalytic Coatings Based on Iron (III) Phthalocyanine Tetracarboxylic Acids–TiO2–Silica Hybrids
Source: MDPI journal article supplement (doi:10.3390/gels9110860), 2023-10-30
Supplement: s1 [file s1]

# **Cellulose Fabrics Functionalized with Sol-Gel Photocatalytic Coatings Based on Iron (III) Phthalocyanine Tetracarboxylic Acids-TiO<sub>2</sub>-Silica Hybrids**

Alina Raditoiu<sup>1</sup>, Valentin Raditoiu <sup>1,\*</sup>, Monica Florentina Raduly <sup>1</sup>, Augusta Raluca Gabor <sup>1</sup>, Adriana Nicoleta Frone <sup>1</sup>, Maria Grapin <sup>1</sup> and Mihai Anastasescu <sup>2</sup>

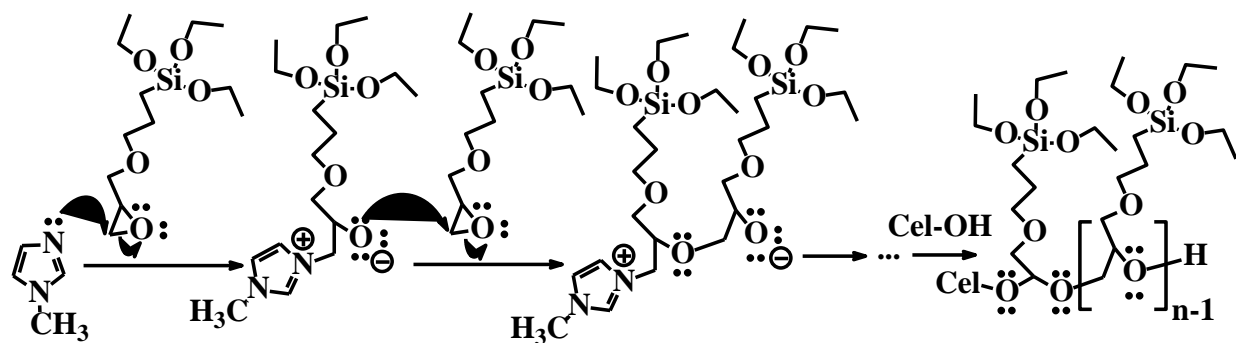

**Scheme S1.** Mechanism of GLYMO homopolymerization catalyzed by MIM

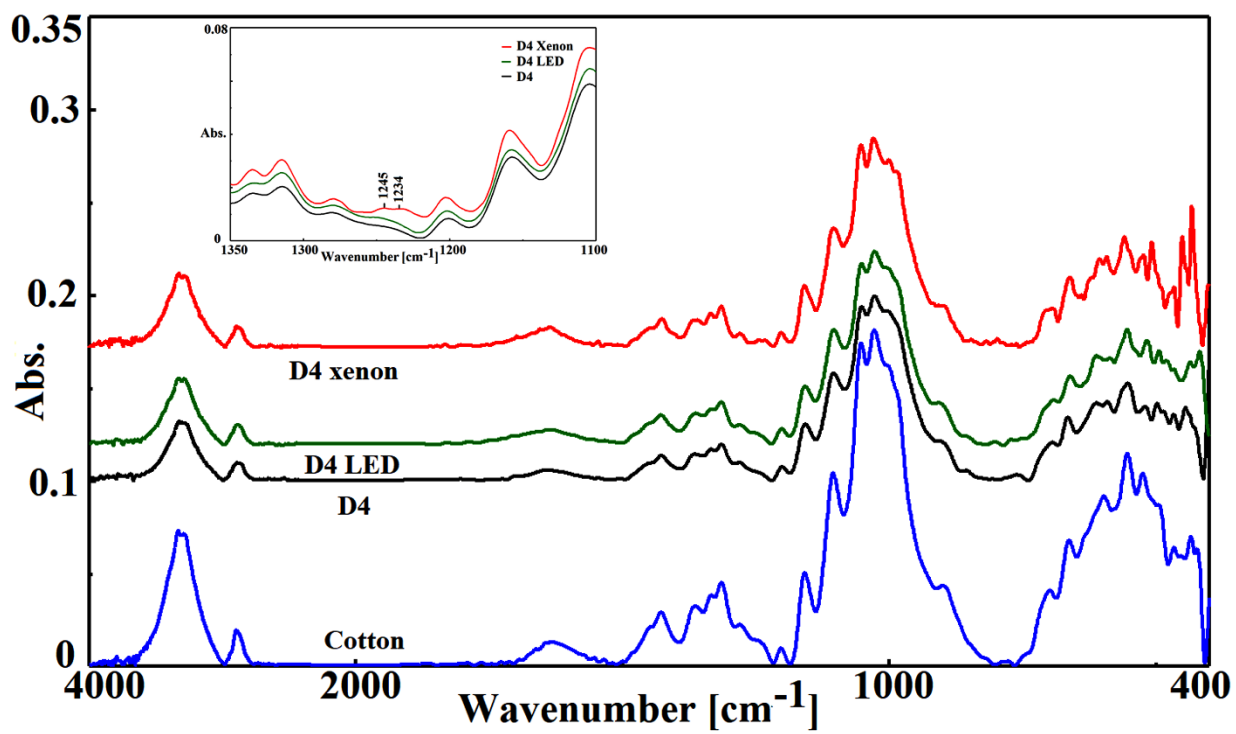

Figure S1. FTIR spectra of D4 exposed to light

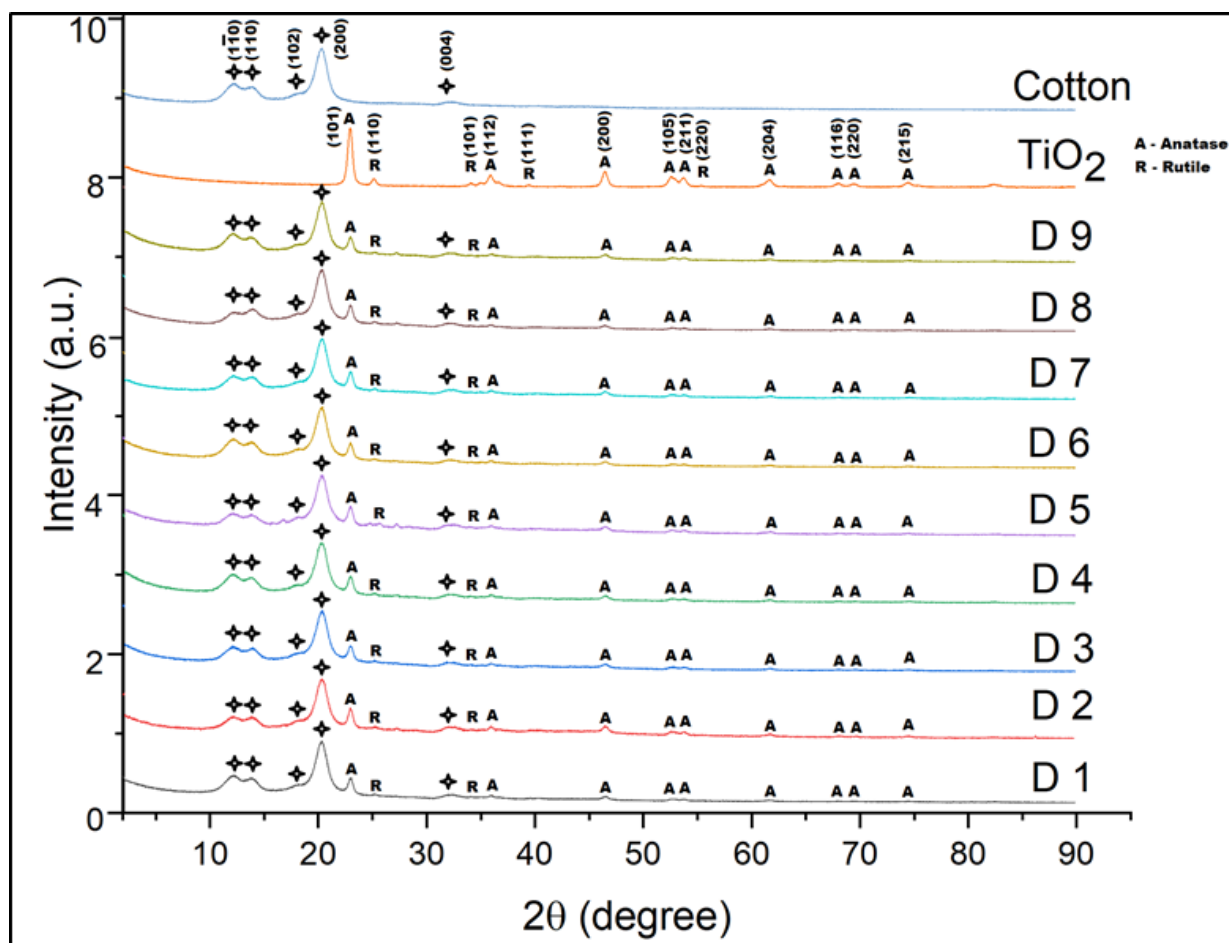

Figure S2. X-ray diffraction pattern of all coated fabrics

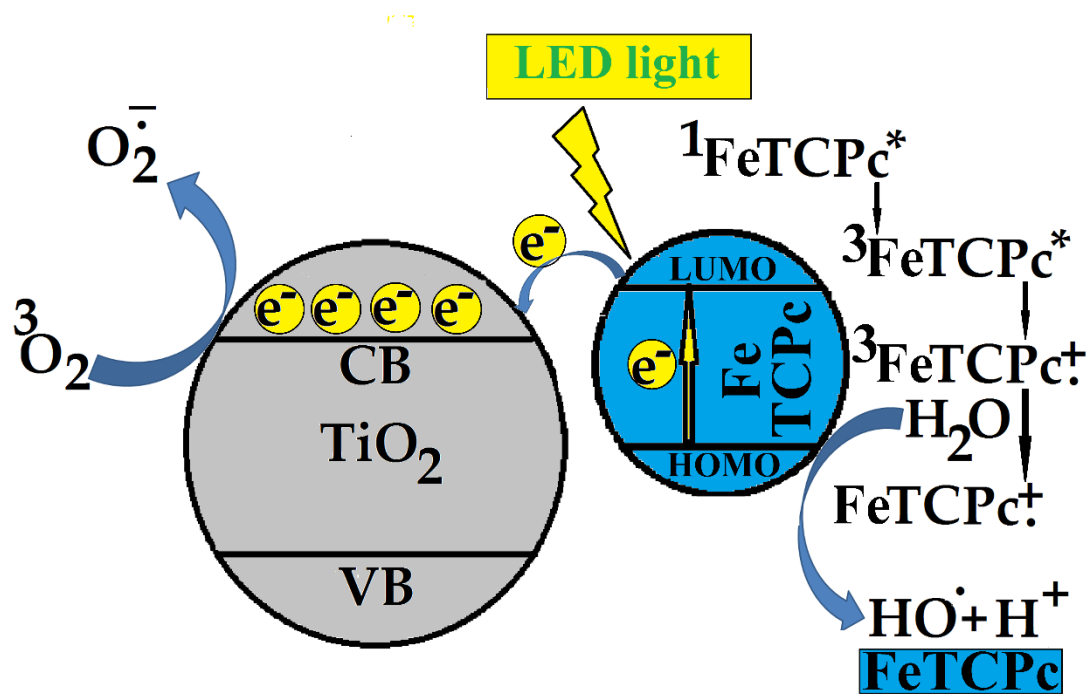

**Figure S3.** Mechanism of charge and reactive species generation under LED light illumination
